# Supplementary material for: In situ synthesis of highly-active Pt nanoclusters via thermal decomposition for high-temperature catalytic reactions
Source: Royal Society of Chemistry journal article supplement (doi:10.1039/c6ra04681a), 2016-01-01
Supplement: c6ra04681a1.pdf [file c6ra04681a1.pdf]

## Supporting Information

### ***In situ* synthesis of highly-active Pt nanoclusters via thermal decomposition for high-temperature catalytic reactions**

Shao-Cong Ouyang<sup>1,†</sup>, Li-Wei Wang<sup>2,†</sup>, Xi-Wen Du<sup>1</sup>, Cui Zhang<sup>2,\*</sup>, Jing Yang<sup>1,\*</sup>

<sup>1</sup>Institute of New-Energy Materials, Tianjin Key Laboratory of Composite and Functional Materials, School of Materials Science and Engineering, Tianjin University, Tianjin 300072, P. R. China.

<sup>2</sup>Institute of New Catalytic Materials Science, College of Chemistry, Nankai University, Tianjin 300071, P. R. China.

\*Corresponding authors.

*E-mail address:* yang\_jing@tju.edu.cn (J. Yang); zhangcui@nankai.edu.cn (C. Zhang).

†These authors contribute equally to this work.

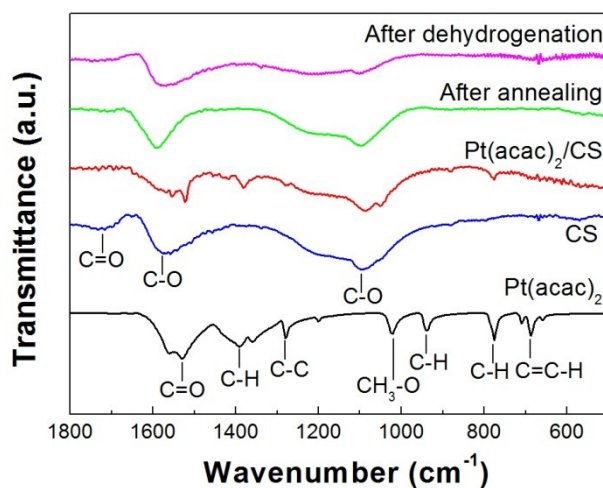

**Figure S1.** FTIR spectra of Pt(acac)<sub>2</sub>, CS, Pt(acac)<sub>2</sub>/CS composites with a Pt content of 2.83 wt%, the composites after being annealed at 320 °C for 30 min in nitrogen atmosphere, and the composites following the catalytic dehydrogenation reaction.

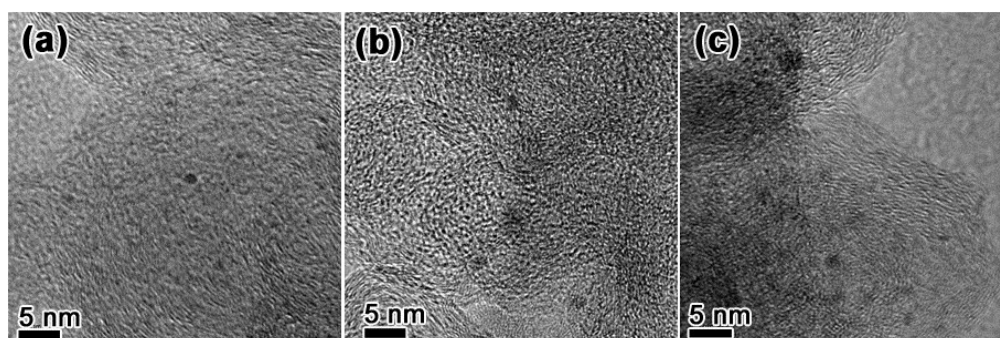

**Figure S2.** TEM images of as-prepared samples with different Pt contents. (a) 0.18wt%, (b) 0.37wt%, and (c) 0.60wt%.

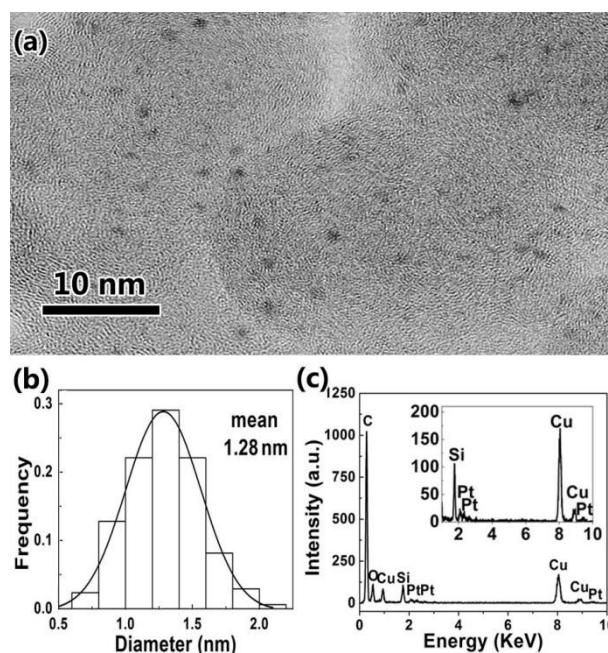

**Figure S3.** (a) TEM image of the Pt nanoclusters on CS with a Pt loading of 2.83wt%. (b) The size histogram with Gaussian fitting for the NPs. (c) EDX spectrum of the Pt/C composites. The inset is an enlarged view.

**Table S1.** Hydrogen evolution rate of MCH over various Pt-based catalysts.

| Catalysts                                                   | Preparation technique | Temp (°C) | H <sub>2</sub> evolution rate (mmol/g <sub>met</sub> /min) | Ref.      |
|-------------------------------------------------------------|-----------------------|-----------|------------------------------------------------------------|-----------|
| .4wt% Pt/CB                                                 | Wet impregnation      | 300       | 342                                                        | [21]      |
| 10%wt% Pt/ACC                                               | Wet impregnation      | 298       | 520                                                        | [24]      |
| 3wt% Pt/La <sub>2</sub> O <sub>3</sub>                      | Wet impregnation      | 350       | 21.1                                                       | [25]      |
| 1wt% Pt/La <sub>0.7</sub> Y <sub>0.3</sub> NiO <sub>3</sub> | Wet impregnation      | 350       | 45.76                                                      | [25]      |
| 3wt% Pt/V <sub>2</sub> O <sub>5</sub>                       | Wet impregnation      | 350       | 330                                                        | [26]      |
| 3wt% Pt/Y <sub>2</sub> O <sub>3</sub>                       | Wet impregnation      | 350       | 772                                                        | [26]      |
| 0.37wt% Pt/CS                                               | <i>In-situ</i> method | 320       | 575                                                        | This work |

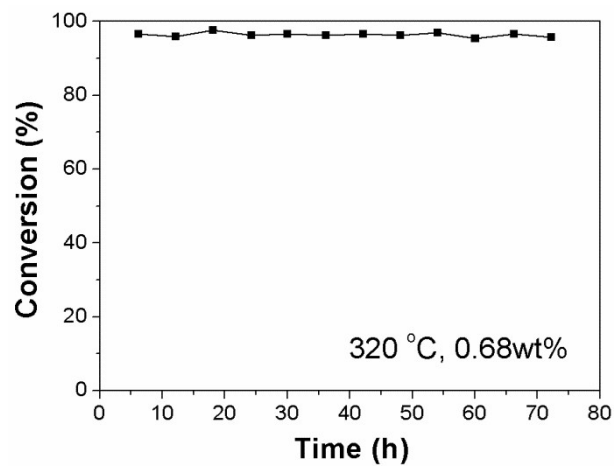

**Figure S4.** The durability of the catalyst with a Pt loading of 0.68wt% at 320 °C.
